# Supplementary material
Source: PubMed Central journal article supplement (PMC6626556)
Supplement: NIHMS1033972-supplement-3.pdf [file NIHMS1033972-supplement-3.pdf]

406 Supplementary Table 1. Reclassification table based on the full model with BNP level versus the  
 407 full model without BNP level  
 408

| No POAF                                      |                                           |            |      |                |
|----------------------------------------------|-------------------------------------------|------------|------|----------------|
|                                              | Full model with BNP, Prob <sub>POAF</sub> |            |      |                |
| Full model without BNP, Prob <sub>POAF</sub> | <15%                                      | 15 to <30% | ≥30% | % reclassified |
| <15%                                         | 226                                       | 30         | 2    | 12             |
| 15% to <30%                                  | 60                                        | 105        | 28   | 46             |
| ≥30%                                         | 0                                         | 19         | 41   | 32             |
| POAF                                         |                                           |            |      |                |
|                                              | Full model with BNP, Prob <sub>POAF</sub> |            |      |                |
| Full model without BNP, Prob <sub>POAF</sub> | <15%                                      | 15 to <30% | ≥30% | % reclassified |
| <15%                                         | 22                                        | 8          | 1    | 29             |
| 15% to <30%                                  | 7                                         | 31         | 12   | 38             |
| ≥30%                                         | 0                                         | 4          | 39   | 9              |
| Combined                                     |                                           |            |      |                |
|                                              | Full model with BNP, Prob <sub>POAF</sub> |            |      |                |
| Full model without BNP, Prob <sub>POAF</sub> | <15%                                      | 15 to <30% | ≥30% | % reclassified |
| <15%                                         | 248                                       | 38         | 3    | 14             |
| 15% to <30%                                  | 67                                        | 136        | 40   | 44             |
| ≥30%                                         | 0                                         | 23         | 80   | 22             |

409

410 Variables in the full model include age, body mass index, history of atrial fibrillation, and extent  
411 of surgery. Categorical net reclassification index (NRI)=0.118 (95% CI, 0.019-0.217;  $P=0.020$ ).  
412 Continuous NRI=0.390 (95% CI, 0.196-0.583;  $P<0.0001$ ). BNP, brain natriuretic peptide;  
413 POAF, postoperative atrial fibrillation; Prob<sub>POAF</sub>, predicted probability of POAF.

414 **Video Legend**

415 Dr. Amar discusses the importance of the study findings to the practice of thoracic surgery.

416

417 **Supplemental Appendix**

418 Interactive calculator to estimate the probability of postoperative atrial fibrillation (POAF) given

419 user input of age, body mass index (BMI), brain natriuretic peptid (BNP) level, history of atrial

420 fibrillation (AF), and extent of surgery.
